# Supplementary material for: High morbidity and mortality in children with untreated congenital deficiency of leptin or its receptor
Source: PubMed Central journal article supplement (PMC10518629; doi:10.1016/j.xcrm.2023.101187), 2023-09-01
Supplement: mmc1.pdf [file mmc1.pdf]

**Cell Reports Medicine, Volume 4**

**Supplemental information**

**High morbidity and mortality in children  
with untreated congenital deficiency  
of leptin or its receptor**

**Sadia Saeed, Roohia Khanam, Qasim M. Janjua, Jaida Manzoor, Lijiao Ning, Sharoon Hanook, Mickaël Canouil, Muhammad Ali, Hina Ayesha, Waqas I. Khan, I. Sadaf Farooqi, Giles S.H. Yeo, Stephen O'Rahilly, Amélie Bonnefond, Taeed A. Butt, Muhammad Arslan, and Philippe Froguel**

## **Supplementary Information**

## Supplementary Tables

**Table S1.** Mortality in severely obese patients with LEP, LEPR and MC4R deficiencies and with unknown genetic cause, and in normal body weight controls. Related to Figures 1 and 2

| <b>Group</b>                       | <b>No. of families (n)</b> | <b>Reported mortality (n)</b> | <b>Mortality %</b> | <b>Age range (y)*</b> |
|------------------------------------|----------------------------|-------------------------------|--------------------|-----------------------|
| LEP deficient                      | 83                         | 22                            | 26                 | 1.8-17.5              |
| LEPR deficient                     | 31                         | 3                             | 9                  | 2.5-5.5               |
| MC4R deficient                     | 18                         | 0                             | 0                  | NA**                  |
| Obesity with unknown genetic cause | 35                         | 2                             | 5.7                | 4.0-7.0               |
| Lean controls                      | 68                         | 0                             | 0                  | NA**                  |

\* Refers to age at mortality

\*\* Not applicable

**Table S2.** Physical characteristics of severely obese children with *LEP*, *LEPR* and *MC4R* mutations and normal controls. Related to Results: Body Growth

| Characteristic  | <i>LEP</i> deficient       | <i>LEPR</i> deficient      | <i>MC4R</i> deficient         | Controls                      |
|-----------------|----------------------------|----------------------------|-------------------------------|-------------------------------|
| <i>n</i>        | 112                        | 49                         | 27                            | 69                            |
| Age (years)     | 3.3 ± 0.3 <sup>c, d</sup>  | 4.3 ± 0.6 <sup>d</sup>     | 6.0 ± 0.8 <sup>a</sup>        | 6.5 ± 0.4 <sup>a, b</sup>     |
| Height (cm)     | 92.2 ± 2.4 <sup>c, d</sup> | 99.1 ± 4.0 <sup>c</sup>    | 116.6 ± 5.2 <sup>a, b</sup>   | 111.3 ± 2.8 <sup>a</sup>      |
| Weight (Kg)     | 33.0 ± 2.3 <sup>c, d</sup> | 36.8 ± 3.7 <sup>c, d</sup> | 52.8 ± 6.2 <sup>a, b, d</sup> | 21.6 ± 1.6 <sup>a, b, c</sup> |
| BMI SDS for age | 7.9 ± 0.3 <sup>d</sup>     | 7.7 ± 0.5 <sup>d</sup>     | 6.5 ± 0.5 <sup>d</sup>        | -0.3 ± 0.2 <sup>a, b, c</sup> |

Superscripts indicate statistically significant  $P < 0.05$  (Scheffe's multiple test); <sup>a</sup> vs *LEP* deficient, <sup>b</sup> vs *LEPR* deficient, <sup>c</sup> vs *MC4R* deficient, <sup>d</sup> vs controls

Data represents Mean ± SEM

**Table S3.** Age-related changes in physical characteristics in children carrying *LEP*, *LEPR* and *MC4R* mutations and age-matched normal controls. Related to Results: Body Growth

| Age group (y)                     | <i>LEP</i><br>n | <i>LEP</i><br>Mean (SEM)   | <i>LEPR</i><br>n | <i>LEPR</i><br>Mean (SEM)  | <i>MC4R</i><br>n | <i>MC4R</i><br>Mean (SEM)   | Control<br>n | Control<br>Mean (SEM)         |
|-----------------------------------|-----------------|----------------------------|------------------|----------------------------|------------------|-----------------------------|--------------|-------------------------------|
| <b>A-Longitudinal height (cm)</b> |                 |                            |                  |                            |                  |                             |              |                               |
| ≤1-4.9                            | 84              | 80.7 ± 1.5                 | 30               | 80.0 ± 2.3                 | 10               | 90.0 ± 4.5                  | 22           | 87.9 ± 2.7                    |
| 5-9.9                             | 20              | 118.3 ± 2.7                | 14               | 125.3 ± 3.0 <sub>d</sub>   | 11               | 120.6 ± 3.5                 | 31           | 112.5 ± 1.9 <sup>b</sup>      |
| 10-15                             | 8               | 147.8 ± 2.9                | 5                | 140.6 ± 8.3                | 6                | 153.8 ± 4.5                 | 16           | 141.1 ± 4.5                   |
| Cumulative                        | 112             | 92.2 ± 2.4 <sub>c, d</sub> | 49               | 99.1 ± 4.0 <sup>c</sup>    | 27               | 116.6 ± 5.2 <sup>a, b</sup> | 69           | 111.3 ± 2.8 <sup>a</sup>      |
| <b>B- Body weight (kg)</b>        |                 |                            |                  |                            |                  |                             |              |                               |
| ≤1-4.9                            | 84              | 22.6 ± 1.1 <sub>d</sub>    | 30               | 21.2 ± 1.4 <sup>d</sup>    | 10               |                             | 22           | 11.8 ± 0.6 <sup>a, b, c</sup> |
| 5-9.9                             | 20              | 52.9 ± 4.5 <sub>d</sub>    | 14               | 50.4 ± 3.8 <sup>d</sup>    | 11               |                             | 31           | 18.4 ± 0.6 <sup>a, b, c</sup> |
| 10-15                             | 8               | 91.8 ± 5.4 <sub>d</sub>    | 5                | 92.5 ± 11.0 <sup>d</sup>   | 6                |                             | 16           | 41.2 ± 3.6 <sup>a, b, c</sup> |
| Cumulative                        | 112             | 33.0 ± 2.3 <sub>c, d</sub> | 49               | 36.8 ± 3.7 <sup>c, d</sup> | 27               |                             | 69           | 21.6 ± 1.6 <sup>a, b, c</sup> |
| <b>C- BMI SDS</b>                 |                 |                            |                  |                            |                  |                             |              |                               |
| ≤1-4.9                            | 84              | 8.2 ± 0.3 <sup>d</sup>     | 30               | 8.6 ± 0.7 <sup>d</sup>     | 10               |                             | 22           | -0.3 ± 0.3 <sup>a, b, c</sup> |
| 5-9.9                             | 20              | 8.1 ± 0.8 <sup>d</sup>     | 14               | 6.3 ± 0.8 <sup>d</sup>     | 11               |                             | 31           | -0.7 ± 0.2 <sup>a, b, c</sup> |
| 10-15                             | 8               | 4.7 ± 0.4 <sup>d</sup>     | 5                | 5.8 ± 0.3 <sup>d</sup>     | 6                |                             | 16           | 0.6 ± 0.4 <sup>a, b, c</sup>  |
| Cumulative                        | 112             | 7.9 ± 0.3 <sup>d</sup>     | 49               | 7.7 ± 0.5 <sup>d</sup>     | 27               |                             | 69           | -0.3 ± 0.2 <sup>a, b, c</sup> |

Superscript letters indicate statistically significant  $P < 0.05$  (Scheffe's multiple test); <sup>a</sup> vs *LEP* deficient, <sup>b</sup> vs *LEPR* deficient, <sup>c</sup> vs *MC4R* deficient, <sup>d</sup> vs controls.

Data represent Mean ± SEM

**Table S4.** Statistical analysis of age-related changes in height in *LEP*, *LEPR*, and *MC4R* deficient children and normal body weight controls. Related to Results: Body Growth

| <b>Terms</b> | <b>Estimate</b> | <b>Std Error</b> | <b>Statistics</b> | <b>P. value</b> |
|--------------|-----------------|------------------|-------------------|-----------------|
| Age          | 6.5             | 0.2              | 37.7              | 2.311           |
| Gender       | 1.1             | 1.3              | 0.9               | 0.396           |
| LEP (group)  | 1.7             | 1.6              | 1.0               | 0.302           |
| LEPR (group) | 2.3             | 1.9              | 1.2               | 0.229           |
| MC4R (group) | 8.7             | 2.3              | 3.9               | 0.000           |
| Intercept    | 68.4            | 1.8              | 38.0              | 3.869           |

Statistical model: Height ~ age + gender + group

Trait: Height (cm)

**Table S5.** Age-related changes in biochemical characteristics and stress biomarkers in children carrying *LEP*, *LEPR* and *MC4R* mutations and age-matched normal controls. Related to Results: Metabolic Characteristics

| Age group (y)              | n   | <i>LEP</i> Mean (SEM)         | <i>LEPR</i> n | <i>LEPR</i> Mean (SEM)        | <i>MC4R</i> n | <i>MC4R</i> Mean (SEM)        | Control n | Control Mean (SEM)           |
|----------------------------|-----|-------------------------------|---------------|-------------------------------|---------------|-------------------------------|-----------|------------------------------|
| <b>A-Insulin (μIU/ml)</b>  |     |                               |               |                               |               |                               |           |                              |
| ≤1-4.9                     | 83  | 21.9 ± 2.3                    | 30            | 31.1 ± 4.9 <sup>d</sup>       | 9             | 38.9 ± 13.2 <sup>d</sup>      | 19        | 7.8 ± 0.8 <sup>b, c</sup>    |
| 5-9.9                      | 20  | 26.2 ± 5.7                    | 14            | 42.3 ± 9.8 <sup>d</sup>       | 11            | 47.7 ± 11.6 <sup>d</sup>      | 30        | 6.9 ± 0.9 <sup>b, c</sup>    |
| 10-15                      | 8   | 48.7 ± 15.3                   | 5             | 104.2 ± 32.4 <sup>d</sup>     | 6             | 66.4 ± 36.1                   | 12        | 5.3 ± 0.5 <sup>b</sup>       |
| Cumulative                 | 111 | 24.6 ± 2.3 <sup>b, c, d</sup> | 49            | 41.8 ± 5.9 <sup>a, d</sup>    | 26            | 49.0 ± 10.3 <sup>a, d</sup>   | 61        | 6.9 ± 0.5 <sup>a, b, c</sup> |
| <b>B-Leptin (ng/ml)</b>    |     |                               |               |                               |               |                               |           |                              |
| ≤1-4.9                     | 80  | 0.1 ± 0.0 <sup>b, c</sup>     | 30            | 35.0 ± 3.6 <sup>a, c, d</sup> | 9             | 19.9 ± 4.5 <sup>a, b, d</sup> | 22        | 2.6 ± 0.1 <sup>b, c</sup>    |
| 5-9.9                      | 20  | 0.1 ± 0.0 <sup>b, c</sup>     | 14            | 23.8 ± 2.7 <sup>a, d</sup>    | 11            | 24.9 ± 5.3 <sup>a, d</sup>    | 31        | 3.3 ± 0.2 <sup>b, c</sup>    |
| 10-15                      | 8   | 0.0 ± 0.0 <sup>b, c</sup>     | 5             | 36.0 ± 12.9 <sup>a, d</sup>   | 6             | 40.5 ± 7.2 <sup>a, d</sup>    | 15        | 3.6 ± 0.3 <sup>b, c</sup>    |
| Cumulative                 | 108 | 0.1 ± 0.0 <sup>b, c</sup>     | 49            | 31.9 ± 2.7 <sup>a, d</sup>    | 26            | 26.7 ± 3.5 <sup>a, d</sup>    | 68        | 3.1 ± 0.1 <sup>b, c</sup>    |
| <b>C- Cortisol (μg/dl)</b> |     |                               |               |                               |               |                               |           |                              |
| ≤1-4.9                     | 83  |                               | 30            | 17.2 ± 0.9 <sup>c, d</sup>    | 9             | 14.5 ± 0.9 <sup>a</sup>       | 19        | 10.5 ± 0.8 <sup>a</sup>      |
| 5-9.9                      | 20  |                               | 14            | 13.6 ± 1.5                    | 11            | 11.1 ± 1.1                    | 30        | 10.4 ± 1.6                   |
| 10-15                      | 8   |                               | 5             | 12.9 ± 2.8                    | 6             | 12.3 ± 0.7                    | 12        | 12.6 ± 1.6                   |
| Cumulative                 | 111 |                               | 49            | 16.2 ± 0.8 <sup>b, c, d</sup> | 26            | 13.3 ± 0.7 <sup>a, d</sup>    | 61        | 10.9 ± 0.8 <sup>a</sup>      |
| <b>D- TSH (uIU/ml)</b>     |     |                               |               |                               |               |                               |           |                              |
| ≤1-4.9                     | 84  | 2.2 ± 0.1                     | 30            | 2.1 ± 0.2                     | 9             | 1.8 ± 0.4                     | 19        | 1.8 ± 0.1                    |
| 5-9.9                      | 20  | 2.2 ± 0.3                     | 14            | 2.9 ± 0.7                     | 11            | 2.2 ± 0.3                     | 30        | 2.3 ± 0.2                    |
| 10-15                      | 8   | 2.5 ± 0.3                     | 5             | 1.7 ± 0.4                     | 6             | 2.2 ± 0.7                     | 12        | 2.3 ± 0.2                    |

|                                    |     |                             |    |                             |    |                                |    |                                |
|------------------------------------|-----|-----------------------------|----|-----------------------------|----|--------------------------------|----|--------------------------------|
| Cumulative                         | 112 | 2.2 ± 0.1                   | 49 | 2.3 ± 0.2                   | 26 | 2.1 ± 0.2                      | 61 | 2.2 ± 0.1                      |
| <b>E- Oxidative stress markers</b> |     |                             |    |                             |    |                                |    |                                |
| MDA (nmol/ml)                      |     | 3.20 ± 0.24 <sup>c, d</sup> |    | 3.54 ± 0.14 <sup>c, d</sup> |    | 1.35 ± 0.05 <sup>a, b, d</sup> |    | 0.66 ± 0.05 <sup>a, b, c</sup> |
| (n)                                |     | (11)                        |    | (10)                        |    | (8)                            |    | (16)                           |
| GSH (µg/dl)                        |     | 1.33 ± 0.12 <sup>c, d</sup> |    | 1.40 ± 0.05 <sup>c, d</sup> |    | 2.98 ± 0.23 <sup>a, b, d</sup> |    | 4.82 ± 0.32 <sup>a, b, c</sup> |
| (n)                                |     | (11)                        |    | (10)                        |    | (8)                            |    | (16)                           |
| 8-OHdG (ng/ml)                     |     | 25.8 ± 3.2 <sup>c</sup>     |    | 21.0 ± 2.5 <sup>c</sup>     |    | 9.2 ± 1.3 <sup>a, b</sup>      |    | 4.3 ± 0.2 <sup>a, b</sup>      |
| (n)                                |     | (28)                        |    | (19)                        |    | (6)                            |    | (12)                           |

Superscript letters indicate statistically significant  $P < 0.05$  (Scheffe test); <sup>a</sup> vs LEP deficient, <sup>b</sup> vs LEPR deficient, <sup>c</sup> vs MC4R deficient, <sup>d</sup> vs controls.

Data represent Mean ± SEM



## Supplementary Figures

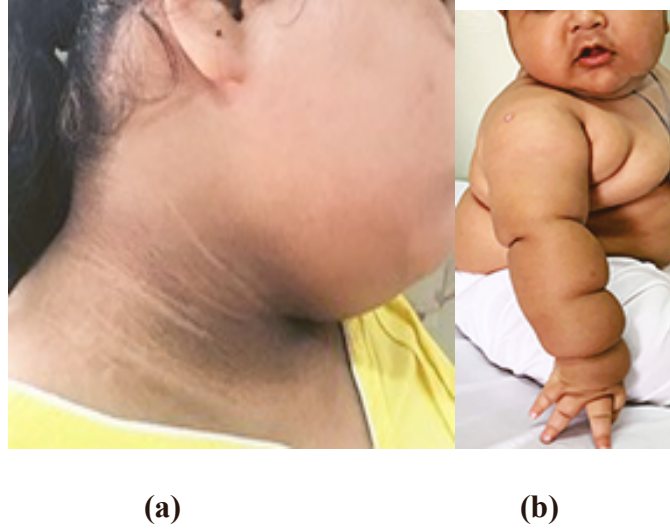

**Supplementary Figure 1.** (a) Acanthosis nigricans and (b) prominent sub-cutaneous adipose tissue in two *LEP* deficient children. Related to results: Clinical Phenotype.

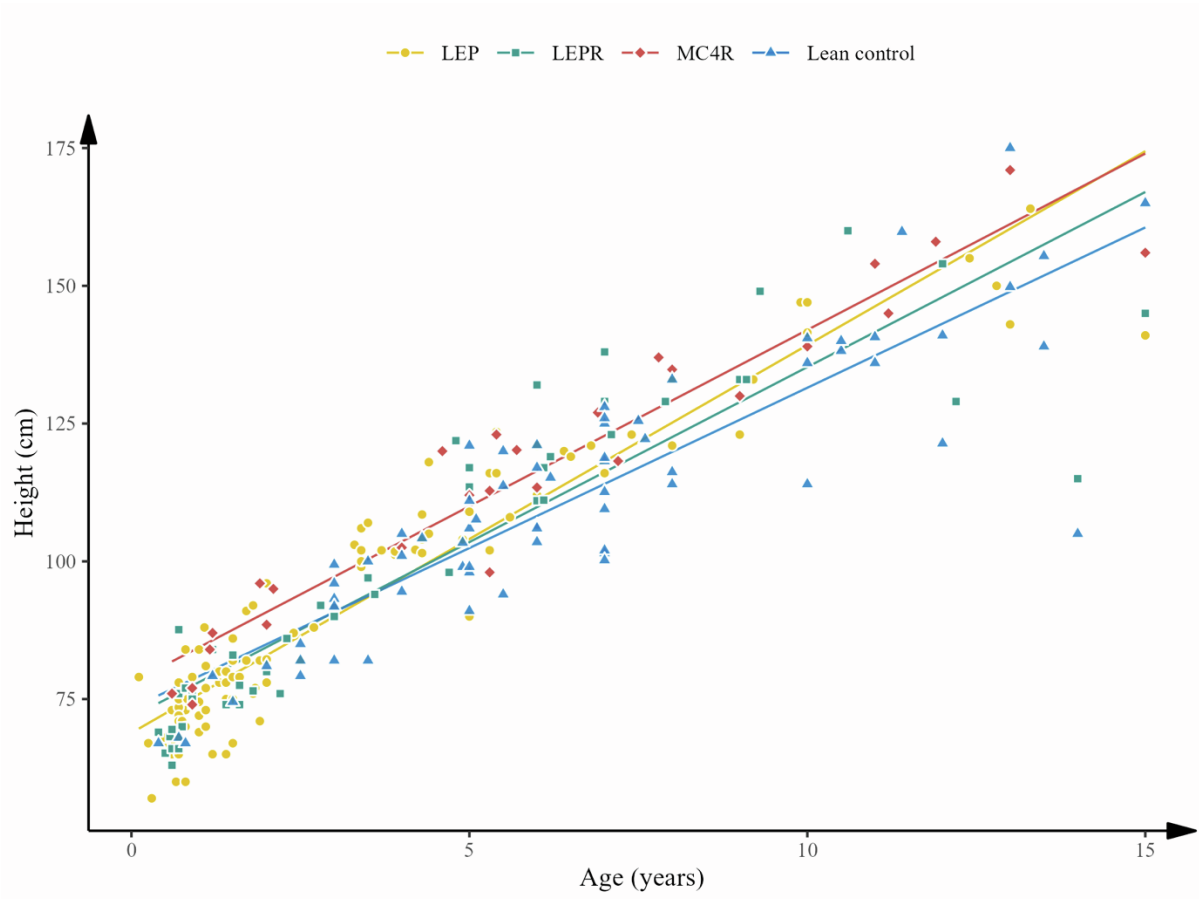

**Supplementary Figure 2.** Age-related changes in height in *LEP*, *LEPR* and *MC4R* deficient children and normal body weight controls. Related to Results: Body Growth.

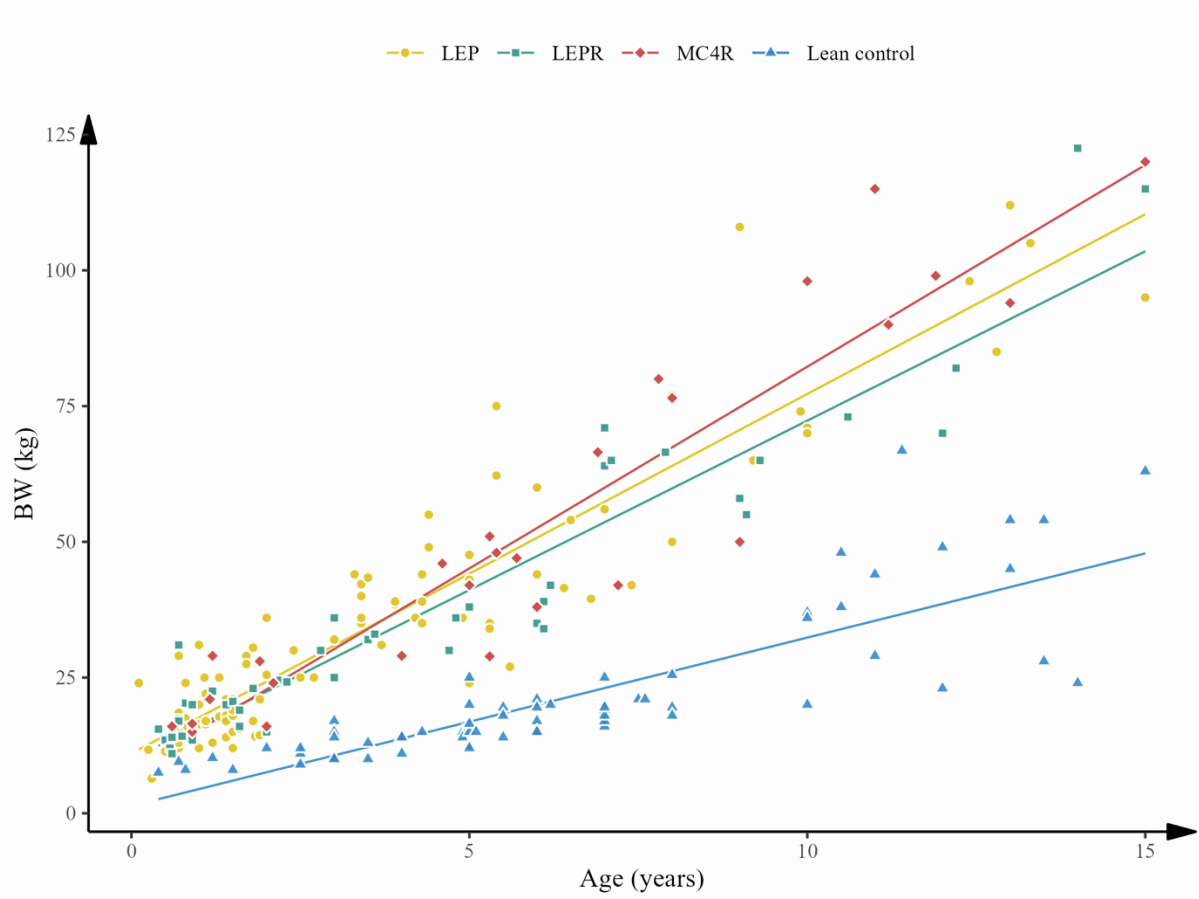

**Supplementary Figure 3.** Age-related changes in body weight (BW) in *LEP*, *LEPR* and *MC4R* deficient children and normal body weight controls. Related to Results: Body Growth.
